# Supplementary material for: Virtual Screening for SARS-CoV-2 Main Protease Inhibitory Peptides from the Putative Hydrolyzed Peptidome of Rice Bran
Source: MDPI journal article supplement (doi:10.3390/antibiotics11101318), 2022-09-27
Supplement: s1 [file s1]

**Table S1.** Total peptide sequences from the putative peptidome of rice bran (*Oryza sativa*) hydrolyzed by pepsin, trypsin, and chymotrypsin

| ID    | Sequences                   | length<br>(aa) | original<br>protein | digested by  |
|-------|-----------------------------|----------------|---------------------|--------------|
| seq1  | AAAAAASGE                   | 9              | Globulin            | Pepsin       |
| seq2  | AAAAAASGEDRRRETSL           | 17             | Globulin            | Chymotrypsin |
| seq3  | AAASLPFCNVNDIPNGTGGVCYWLGYP | 28             | Albumin             | Trypsin      |
| seq4  | AASARE                      | 6              | Globulin            | Pepsin       |
| seq5  | AASAREVDEL                  | 10             | Globulin            | Chymotrypsin |
| seq6  | AATATMADHHKDQVVY            | 16             | Albumin             | Chymotrypsin |
| seq7  | AAVDDSW                     | 7              | Albumin             | Chymotrypsin |
| seq8  | ADTYNPR                     | 7              | Glutelin            | Trypsin      |
| seq9  | AEHDIRVAVVNITAGSMNAPF       | 21             | Globulin            | Chymotrypsin |
| seq10 | AGMNSVL                     | 7              | Globulin            | Chymotrypsin |
| seq11 | AGNKRN PQAY                 | 10             | Glutelin            | Chymotrypsin |
| seq12 | LLPPFHQASSLLR               | 13             | Globulin            | Trypsin      |
| seq13 | AHCICY                      | 6              | Globulin            | Pepsin       |
| seq14 | AIRQGD                      | 6              | Globulin            | Pepsin       |
| seq15 | AIRQGDVF                    | 8              | Globulin            | Chymotrypsin |
| seq16 | AIVACNASARF                 | 11             | Prolamin            | Chymotrypsin |
| seq17 | ALGVSSQVARQLQCQND           | 17             | Glutelin            | Pepsin       |
| seq18 | ALLAIVACNASARF              | 14             | Prolamin            | Pepsin       |
| seq19 | ALPNDVLANAYR                | 12             | Glutelin            | Trypsin      |
| seq20 | ALSQSY                      | 6              | Prolamin            | Pepsin       |
| seq21 | ANPRSF                      | 6              | Globulin            | Pepsin       |
| seq22 | ANRHGRL                     | 7              | Globulin            | Chymotrypsin |
| seq23 | ANRHGRLY                    | 8              | Globulin            | Pepsin       |
| seq24 | APGGRNPE                    | 8              | Globulin            | Pepsin       |
| seq25 | APGGRNPESF                  | 10             | Globulin            | Chymotrypsin |
| seq26 | AQRLKHNRGD                  | 10             | Glutelin            | Pepsin       |
| seq27 | ASEEQVR                     | 7              | Globulin            | Trypsin      |
| seq28 | ASLQE                       | 5              | Glutelin            | Pepsin       |
| seq29 | ATILLLLAAVLFAAAAAASGEDR     | 23             | Globulin            | Trypsin      |
| seq30 | AVVKKAQREGCAY               | 13             | Glutelin            | Chymotrypsin |
| seq31 | CCRQLAAVD                   | 9              | Albumin             | Pepsin       |
| seq32 | CEQDR                       | 5              | Globulin            | Trypsin      |
| seq33 | CNGSL                       | 5              | Glutelin            | Chymotrypsin |
| seq34 | CNVNDIPNGTGGVCY             | 14             | Albumin             | Chymotrypsin |
| seq35 | CQPGMGYPMYSLPR              | 14             | Albumin             | Trypsin      |
| seq36 | CRCAL                       | 6              | Albumin             | Chymotrypsin |
| seq37 | CTLRVRQNID                  | 10             | Glutelin            | Pepsin       |
| seq38 | CVQECK                      | 6              | Globulin            | Trypsin      |
| seq39 | DEHQB                       | 5              | Glutelin            | Trypsin      |
| seq40 | DFLLAGNK                    | 8              | Glutelin            | Trypsin      |
| seq41 | DGEAEIVCPHL                 | 13             | Globulin            | Chymotrypsin |
| seq42 | DPQAKEL                     | 7              | Globulin            | Chymotrypsin |
| seq43 | DPRQRDF                     | 7              | Glutelin            | Chymotrypsin |
| seq44 | DQQQQQQER                   | 9              | Globulin            | Trypsin      |
| seq45 | DQTQAQAQAL                  | 10             | Prolamin            | Chymotrypsin |
| seq46 | DQVVYSLGER                  | 10             | Albumin             | Trypsin      |
| seq47 | DSTLQIVCFDVHANNNER          | 18             | Globulin            | Trypsin      |

| ID    | Sequences             | length<br>(aa) | original<br>protein | digested by  |
|-------|-----------------------|----------------|---------------------|--------------|
| seq48 | DVHANNNERMY           | 11             | Globulin            | Chymotrypsin |
| seq49 | DVSNEQF               | 7              | Glutelin            | Chymotrypsin |
| seq50 | EADARSF               | 7              | Globulin            | Chymotrypsin |
| seq51 | EANPRSF               | 7              | Globulin            | Chymotrypsin |
| seq52 | EEAQR                 | 5              | Glutelin            | Trypsin      |
| seq53 | EEEEEEEEQQK           | 11             | Globulin            | Trypsin      |
| seq54 | EGCAYIAFK             | 9              | Glutelin            | Trypsin      |
| seq55 | EHGGHDDDR             | 9              | Globulin            | Trypsin      |
| seq56 | ELAFAASAR             | 9              | Globulin            | Trypsin      |
| seq57 | ELGATDVGHPMAEVFPGCR   | 19             | Albumin             | Trypsin      |
| seq58 | EPIRSVRSQAGTTEF       | 15             | Glutelin            | Chymotrypsin |
| seq59 | EQRPRF                | 6              | Globulin            | Chymotrypsin |
| seq60 | ERAAASL               | 7              | Albumin             | Chymotrypsin |
| seq61 | ETIRARL               | 7              | Globulin            | Chymotrypsin |
| seq62 | ETSLR                 | 5              | Globulin            | Trypsin      |
| seq63 | EVDELLNAQQESAFLAGPEK  | 20             | Globulin            | Trypsin      |
| seq64 | EVEER                 | 5              | Glutelin            | Trypsin      |
| seq65 | FDALSQSYR             | 9              | Prolamin            | Trypsin      |
| seq66 | GATDVGHPMAEVF         | 13             | Albumin             | Chymotrypsin |
| seq67 | GDEAVETLLR            | 10             | Globulin            | Trypsin      |
| seq68 | GDEFGAFTPIQYK         | 13             | Glutelin            | Trypsin      |
| seq69 | GDLER                 | 5              | Albumin             | Trypsin      |
| seq70 | GEESEDEDR             | 9              | Globulin            | Trypsin      |
| seq71 | GEGSSEEEDEGR          | 12             | Globulin            | Trypsin      |
| seq72 | GEIVR                 | 5              | Glutelin            | Trypsin      |
| seq73 | GERCQPGMGY            | 10             | Albumin             | Chymotrypsin |
| seq74 | GESSRGPF              | 8              | Globulin            | Chymotrypsin |
| seq75 | GGESEER               | 7              | Globulin            | Trypsin      |
| seq76 | GGHGPHWPLPPF          | 12             | Globulin            | Pepsin       |
| seq77 | TNPNSMVSHIAGK         | 13             | Glutelin            | Trypsin      |
| seq78 | GKQDKGVIIIRASEEQVREL  | 19             | Globulin            | Chymotrypsin |
| seq79 | GLLLPHYTNGASLVYIIQGR  | 20             | Glutelin            | Trypsin      |
| seq80 | GPFNILEQR             | 9              | Globulin            | Trypsin      |
| seq81 | GQEEEEEEQVGQGYETIR    | 18             | Globulin            | Trypsin      |
| seq82 | GQLLIQPQHYAVVK        | 14             | Glutelin            | Trypsin      |
| seq83 | GQSTSQW               | 7              | Glutelin            | Chymotrypsin |
| seq84 | GRRSF                 | 5              | Globulin            | Chymotrypsin |
| seq85 | GSGCSNGL              | 8              | Glutelin            | Chymotrypsin |
| seq86 | GSGCSNGLD             | 9              | Glutelin            | Pepsin       |
| seq87 | GTVFVVP SGHPIVVTSSR   | 18             | Globulin            | Trypsin      |
| seq88 | GVIIR                 | 5              | Globulin            | Trypsin      |
| seq89 | GVSSQVARQL            | 10             | Glutelin            | Chymotrypsin |
| seq90 | GVVAIIE               | 7              | Globulin            | Pepsin       |
| seq91 | HASEGGHGPHWPLPPFGESSR | 21             | Globulin            | Trypsin      |
| seq92 | HGGHD                 | 5              | Globulin            | Pepsin       |
| seq93 | HGLSLLQPY             | 9              | Glutelin            | Pepsin       |
| seq94 | HQASSL                | 6              | Globulin            | Chymotrypsin |
| seq96 | HTISVPGQIQF           | 11             | Globulin            | Chymotrypsin |
| seq97 | IAPRSIPTVGGVW         | 13             | Prolamin            | Chymotrypsin |

| ID     | Sequences                     | length<br>(aa) | original<br>protein | digested by  |
|--------|-------------------------------|----------------|---------------------|--------------|
| seq98  | IAPRSIPTVGGVWY                | 14             | Prolamin            | Pepsin       |
| seq99  | IIFVFALLAIVACNASAR            | 18             | Prolamin            | Trypsin      |
| seq100 | IIPQHY                        | 6              | Glutelin            | Chymotrypsin |
| seq101 | IIQGRGITGPTF                  | 12             | Glutelin            | Chymotrypsin |
| seq102 | IIVSVL                        | 6              | Albumin             | Chymotrypsin |
| seq103 | ILHTISVPGQIQFFAPGGR           | 20             | Globulin            | Trypsin      |
| seq104 | INNQVMQQQCCQQL                | 14             | Prolamin            | Chymotrypsin |
| seq105 | IPNGTGGVCY                    | 10             | Albumin             | Pepsin       |
| seq106 | IRVAVVNITAGSMNAPF             | 17             | Globulin            | Pepsin       |
| seq107 | ISEEK                         | 5              | Globulin            | Trypsin      |
| seq108 | IVCPHLSRGGRGGE                | 14             | Globulin            | Pepsin       |
| seq109 | IVRVE                         | 5              | Glutelin            | Pepsin       |
| seq110 | KDEHQKIHRF                    | 10             | Glutelin            | Chymotrypsin |
| seq111 | KGVIIRASE                     | 9              | Globulin            | Pepsin       |
| seq112 | KHNRGDEF                      | 8              | Glutelin            | Chymotrypsin |
| seq113 | KISEEKL                       | 7              | Globulin            | Chymotrypsin |
| seq114 | KSGRRGE                       | 7              | Globulin            | Pepsin       |
| seq115 | KTNPNSMVSHIAGKSSIF            | 18             | Glutelin            | Chymotrypsin |
| seq116 | LAGPE                         | 5              | Globulin            | Pepsin       |
| seq117 | LANTD                         | 5              | Globulin            | Pepsin       |
| seq118 | LDPQAK                        | 6              | Globulin            | Trypsin      |
| seq119 | LGATD                         | 5              | Albumin             | Pepsin       |
| seq120 | LIVTK                         | 5              | Globulin            | Trypsin      |
| seq121 | LLAGNKRNPPQAY                 | 12             | Glutelin            | Pepsin       |
| seq122 | LLCNGSLAQQLLGQSTSQWQSSRRGSPRE | 29             | Glutelin            | Pepsin       |
| seq123 | LLNAQQE                       | 7              | Globulin            | Pepsin       |
| seq124 | LNNGANQLD                     | 9              | Glutelin            | Pepsin       |
| seq125 | LQAFEPPIR                     | 8              | Glutelin            | Trypsin      |
| seq126 | LRRGQLLIIPQHY                 | 13             | Glutelin            | Pepsin       |
| seq127 | LRRHASE                       | 7              | Globulin            | Pepsin       |
| seq128 | LYEADAR                       | 7              | Globulin            | Trypsin      |
| seq129 | MAAAAV                        | 6              | Globulin            | Trypsin      |
| seq130 | MASINR                        | 6              | Glutelin            | Trypsin      |
| seq131 | MASINRPVIF                    | 10             | Glutelin            | Chymotrypsin |
| seq132 | MASNK                         | 5              | Albumin             | Trypsin      |
| seq133 | MASNKVVF                      | 8              | Albumin             | Chymotrypsin |
| seq134 | MATRARATIL                    | 10             | Globulin            | Chymotrypsin |
| seq135 | MATRARATILLLLAAVLF            | 18             | Globulin            | Pepsin       |
| seq136 | MYLAGMNSVLK                   | 11             | Globulin            | Trypsin      |
| seq137 | NAAESS                        | 6              | Glutelin            | Chymotrypsin |
| seq138 | NAQQESAF                      | 8              | Globulin            | Chymotrypsin |
| seq139 | NDGEVPVVAIY                   | 11             | Glutelin            | Chymotrypsin |
| seq140 | NHMGVGGIY                     | 8              | Albumin             | Chymotrypsin |
| seq141 | NINAHSVVY                     | 9              | Glutelin            | Chymotrypsin |
| seq142 | NNGANQL                       | 7              | Glutelin            | Chymotrypsin |
| seq143 | NPESFLSSFSSK                  | 11             | Globulin            | Trypsin      |
| seq144 | NPNRAD                        | 6              | Glutelin            | Pepsin       |
| seq145 | NPQAYR                        | 6              | Glutelin            | Trypsin      |
| seq146 | NPRAGRVTNLNTQNF               | 15             | Glutelin            | Pepsin       |

| ID     | Sequences                 | length (aa) | original protein | digested by  |
|--------|---------------------------|-------------|------------------|--------------|
| seq147 | NTQNF                     | 5           | Glutelin         | Chymotrypsin |
| seq148 | NTRSVKVAY                 | 9           | Globulin         | Chymotrypsin |
| seq149 | PAGVAHW                   | 7           | Glutelin         | Chymotrypsin |
| seq150 | PGCPE                     | 5           | Glutelin         | Pepsin       |
| seq151 | PGCPESY                   | 7           | Glutelin         | Chymotrypsin |
| seq152 | PGCRRGD                   | 7           | Albumin          | Pepsin       |
| seq153 | PGCRRGDL                  | 8           | Albumin          | Chymotrypsin |
| seq154 | PILSLVQMSAVKVNLY          | 16          | Glutelin         | Pepsin       |
| seq155 | PIRSVRSQAGTTE             | 13          | Glutelin         | Pepsin       |
| seq156 | SKGVQRAAF                 | 9           | Globulin         | Chymotrypsin |
| seq157 | PNDVL                     | 5           | Glutelin         | Chymotrypsin |
| seq158 | PPYER                     | 5           | Globulin         | Trypsin      |
| seq159 | PQAKE                     | 5           | Globulin         | Pepsin       |
| seq160 | PRCRAVVKRQCVGHGAPGGAVDEQL | 25          | Albumin          | Chymotrypsin |
| seq161 | PRGLLLPHY                 | 9           | Glutelin         | Pepsin       |
| seq162 | PRQRD                     | 5           | Glutelin         | Pepsin       |
| seq163 | PRTPTGH                   | 8           | Albumin          | Chymotrypsin |
| seq164 | PSICGIY                   | 7           | Prolamin         | Chymotrypsin |
| seq165 | PYVFGR                    | 6           | Globulin         | Trypsin      |
| seq166 | QAISVQAIVQQL              | 13          | Prolamin         | Chymotrypsin |
| seq167 | QAISVQAIVQQLQLQQVGVVY     | 22          | Prolamin         | Pepsin       |
| seq168 | QCQNDQRGEIVRVEHGL         | 17          | Glutelin         | Chymotrypsin |
| seq169 | QCTGVSVRRVIE              | 13          | Glutelin         | Pepsin       |
| seq170 | QCTGVSVRRVIEPRGL          | 17          | Glutelin         | Chymotrypsin |
| seq171 | QCVGHGAPGGAVDEQLR         | 17          | Albumin          | Trypsin      |
| seq172 | QDCCR                     | 5           | Albumin          | Trypsin      |
| seq173 | QEGQY                     | 5           | Glutelin         | Chymotrypsin |
| seq174 | QEQQGQVQSRERY             | 14          | Glutelin         | Chymotrypsin |
| seq175 | QGDVFPVAPAGTINYLANTDGR    | 21          | Globulin         | Trypsin      |
| seq176 | TSLRRCLQRCE               | 11          | Globulin         | Pepsin       |
| seq177 | QQQVQSRE                  | 8           | Glutelin         | Pepsin       |
| seq178 | QGSVRLPPF                 | 10          | Globulin         | Pepsin       |
| seq179 | QIVCF                     | 5           | Globulin         | Chymotrypsin |
| seq180 | QLAAVDDSWCR               | 11          | Albumin          | Trypsin      |
| seq181 | QLINNQVMQQQCCQQLRLVAQQSHY | 25          | Prolamin         | Pepsin       |
| seq182 | QLQCQNDQR                 | 9           | Glutelin         | Trypsin      |
| seq183 | QLQSHLLQQQVLSPCSE         | 18          | Prolamin         | Pepsin       |
| seq184 | QLRQD                     | 5           | Albumin          | Pepsin       |
| seq185 | QNALLSPF                  | 8           | Glutelin         | Pepsin       |
| seq186 | QNIDNPNR                  | 8           | Glutelin         | Trypsin      |
| seq187 | QPATF                     | 5           | Prolamin         | Chymotrypsin |
| seq188 | ITQGRARVQVNNNGKTVF        | 19          | Glutelin         | Chymotrypsin |
| seq189 | QQKGQE                    | 6           | Globulin         | Pepsin       |
| seq190 | QQQQQQE                   | 7           | Globulin         | Pepsin       |
| seq191 | QQQVL                     | 5           | Prolamin         | Chymotrypsin |
| seq192 | QQSGQAQL                  | 8           | Glutelin         | Chymotrypsin |
| seq193 | QQSGQAQLTE                | 10          | Glutelin         | Pepsin       |
| seq194 | QQSQY                     | 5           | Glutelin         | Chymotrypsin |
| seq195 | QQVGVVY                   | 7           | Prolamin         | Chymotrypsin |

| ID     | Sequences                 | length (aa) | original protein | digested by  |
|--------|---------------------------|-------------|------------------|--------------|
| seq196 | QRCEQDRPPY                | 10          | Globulin         | Chymotrypsin |
| seq197 | QRPRF                     | 5           | Globulin         | Pepsin       |
| seq198 | QSSRRGSPRECRF             | 13          | Glutelin         | Chymotrypsin |
| seq199 | QTQAQAQALLALNLPSICGIY     | 21          | Prolamin         | Pepsin       |
| seq200 | QVGQGY                    | 6           | Globulin         | Pepsin       |
| seq201 | QYQLQSHLLLQQQVLSPCSEFVR   | 23          | Prolamin         | Trypsin      |
| seq202 | RAAASLPAF                 | 9           | Albumin          | Pepsin       |
| seq203 | RALPND                    | 6           | Glutelin         | Pepsin       |
| seq204 | RARCVQE                   | 7           | Globulin         | Pepsin       |
| seq205 | RCQPGMGY                  | 8           | Albumin          | Pepsin       |
| seq206 | REEEEEEEQQKGQEEEEEEQVGQGY | 26          | Globulin         | Chymotrypsin |
| seq207 | RGKKGWRE                  | 8           | Globulin         | Pepsin       |
| seq208 | RGSRRRPY                  | 8           | Globulin         | Pepsin       |
| seq209 | RISRE                     | 5           | Glutelin         | Pepsin       |
| seq210 | RISREEAQRL                | 10          | Glutelin         | Chymotrypsin |
| seq211 | RLQAF                     | 5           | Glutelin         | Pepsin       |
| seq212 | RMAAAAV                   | 7           | Globulin         | Chymotrypsin |
| seq213 | RQDCCRQL                  | 8           | Albumin          | Chymotrypsin |
| seq214 | RQGDVIAL                  | 8           | Glutelin         | Chymotrypsin |
| seq215 | RQVVRSD                   | 7           | Globulin         | Pepsin       |
| seq216 | RQVVRSDQGSVRL             | 13          | Globulin         | Chymotrypsin |
| seq217 | RREVEERSQNIF              | 12          | Glutelin         | Chymotrypsin |
| seq218 | RRGQL                     | 5           | Glutelin         | Chymotrypsin |
| seq219 | RRHASEGGHGPHW             | 13          | Globulin         | Chymotrypsin |
| seq220 | RRRRRSHRGRGD              | 12          | Globulin         | Pepsin       |
| seq221 | RSQNIF                    | 6           | Glutelin         | Pepsin       |
| seq222 | RVAVL                     | 5           | Globulin         | Chymotrypsin |
| seq223 | RVAVLE                    | 6           | Globulin         | Pepsin       |
| seq224 | RVRQNIDNPNRADTY           | 15          | Glutelin         | Chymotrypsin |
| seq225 | SALLLIIVSVLAATATMAD       | 19          | Albumin          | Pepsin       |
| seq226 | SDQGSVR                   | 7           | Globulin         | Trypsin      |
| seq227 | SFHDLAEHDIR               | 11          | Globulin         | Trypsin      |
| seq228 | AVVKKAQRE                 | 9           | Glutelin         | Pepsin       |
| seq229 | SIPTVGGVWY                | 10          | Prolamin         | Trypsin      |
| seq230 | SLPRCRAVVKRQCVGHGAPGGAVD  | 24          | Albumin          | Pepsin       |
| seq231 | SPCSEF                    | 6           | Prolamin         | Chymotrypsin |
| seq232 | SQAGTTEFFDVSNEQFQCTGVSVVR | 25          | Glutelin         | Trypsin      |
| seq233 | SNIFSGFSTELLSEALGVSSQVAR  | 25          | Glutelin         | Trypsin      |
| seq234 | SQSQSQKF                  | 8           | Glutelin         | Pepsin       |
| seq235 | SRGGRGGESEERRRERGKGKW     | 21          | Globulin         | Chymotrypsin |
| seq236 | SRGTVF                    | 6           | Globulin         | Chymotrypsin |
| seq237 | SSRGPF                    | 6           | Globulin         | Pepsin       |
| seq238 | STLQIVCF                  | 8           | Globulin         | Pepsin       |
| seq239 | SWCRCSALNHMVGGIY          | 16          | Albumin          | Pepsin       |
| seq240 | SYQDVYNAAESS              | 12          | Glutelin         | Trypsin      |
| seq241 | TESQSQSQKF                | 10          | Glutelin         | Chymotrypsin |
| seq242 | TIRARLSRGTVF              | 12          | Globulin         | Pepsin       |
| seq243 | TLLRMAAAAV                | 10          | Globulin         | Pepsin       |
| seq244 | TNGASL                    | 6           | Glutelin         | Chymotrypsin |

| ID     | Sequences                                | length (aa) | original protein | digested by  |
|--------|------------------------------------------|-------------|------------------|--------------|
| seq245 | TNGASLVY                                 | 8           | Glutelin         | Pepsin       |
| seq246 | TPIQY                                    | 5           | Glutelin         | Chymotrypsin |
| seq247 | TVCLF                                    | 5           | Glutelin         | Pepsin       |
| seq248 | TVFNGELR                                 | 8           | Glutelin         | Trypsin      |
| seq249 | VAPAGTINY                                | 9           | Globulin         | Chymotrypsin |
| seq250 | VAQGE                                    | 5           | Globulin         | Pepsin       |
| seq251 | VAQGEGVVAIHENGW                          | 16          | Globulin         | Chymotrypsin |
| seq252 | VAQQSHY                                  | 7           | Prolamin         | Chymotrypsin |
| seq253 | VAVLEANPR                                | 9           | Globulin         | Trypsin      |
| seq254 | VAVVNITAGSMNAPFYNTR                      | 19          | Globulin         | Trypsin      |
| seq255 | VAYVLDGEGEAEIVCPHLSR                     | 20          | Globulin         | Trypsin      |
| seq256 | VEHGLSLLQPYASLQEQEQGQVQSR                | 25          | Glutelin         | Trypsin      |
| seq257 | VGHPMAE                                  | 7           | Albumin          | Pepsin       |
| seq258 | VHANNNE                                  | 7           | Globulin         | Pepsin       |
| seq259 | VIALPAGVAHWCY                            | 13          | Glutelin         | Pepsin       |
| seq260 | VIEPR                                    | 5           | Glutelin         | Trypsin      |
| seq261 | VLANAY                                   | 6           | Glutelin         | Pepsin       |
| seq262 | VMPHTTD                                  | 7           | Globulin         | Pepsin       |
| seq263 | VMPHTTDAHCICY                            | 13          | Globulin         | Chymotrypsin |
| seq264 | VNLYQNALLSPFWNINAHSVVYITQGR              | 27          | Glutelin         | Trypsin      |
| seq265 | VPVVAIY                                  | 7           | Glutelin         | Pepsin       |
| seq266 | VQMSAVKVN                                | 10          | Glutelin         | Chymotrypsin |
| seq267 | VQVVNNNGK                                | 9           | Glutelin         | Trypsin      |
| seq268 | VRQQHSIVATPF                             | 12          | Prolamin         | Chymotrypsin |
| seq269 | VTNLNTQNFILSLVQMSAVK                     | 21          | Glutelin         | Trypsin      |
| seq270 | VVFSALLLIIVSVLAATATMADHHK                | 25          | Albumin          | Trypsin      |
| seq271 | VVPSGHPIVVTSSRD                          | 15          | Globulin         | Pepsin       |
| seq272 | VVPSGHPIVVTSSRDSTL                       | 18          | Globulin         | Chymotrypsin |
| seq273 | WNINAHSVVY                               | 10          | Glutelin         | Pepsin       |
| seq274 | WQPATF                                   | 6           | Prolamin         | Pepsin       |
| seq275 | YQEGQYQQSQYSGSCSNGLDETFCCLR              | 27          | Glutelin         | Trypsin      |
| seq276 | ANTDGRRKL                                | 9           | Globulin         | Chymotrypsin |
| seq277 | NPRAGRVTNL                               | 10          | Glutelin         | Chymotrypsin |
| seq278 | CSALNHMVGGIYR                            | 13          | Albumin          | Trypsin      |
| seq279 | GRRKLIVTKILHTISVPGQIQF                   | 22          | Globulin         | Pepsin       |
| seq280 | LAGMNSVLKKLD                             | 12          | Globulin         | Pepsin       |
| seq281 | KLLGKQD                                  | 7           | Globulin         | Pepsin       |
| seq282 | MKIIF                                    | 5           | Prolamin         | Chymotrypsin |
| seq283 | SSIFR                                    | 5           | Glutelin         | Trypsin      |
| seq284 | RGIKNY                                   | 6           | Globulin         | Chymotrypsin |
| seq285 | IVTKIL                                   | 6           | Globulin         | Chymotrypsin |
| seq286 | HQKIHRF                                  | 7           | Glutelin         | Pepsin       |
| seq287 | PIVFFTVCLFLLCNGSLAQQLLGQSTSQQWQ<br>SSR   | 33          | Glutelin         | Trypsin      |
| seq288 | QQHSIVATPFWQPATFQLINNQVMQQQC<br>CQQLR    | 33          | Prolamin         | Trypsin      |
| seq289 | AGPEKSGRRGEESEDEDRRRRRSHRGRGD<br>EAVETI  | 35          | Globulin         | Chymotrypsin |
| seq290 | GITGPTFPGPCPESYQQQFQQSGQAQLTESQ<br>SQSQK | 35          | Glutelin         | Trypsin      |

| ID     | Sequences                                     | length (aa) | original protein | digested by |
|--------|-----------------------------------------------|-------------|------------------|-------------|
| seq291 | SFVMPHTHTDAHCCICYVAQGEGVVAIENG<br>EWSYAIR     | 36          | Globulin         | Trypsin     |
| seq292 | QGDVIALPAGVAHWCYNDGEVPVVAIYV<br>TDLNNGANQLDPR | 41          | Glutelin         | Trypsin     |
